# Supplementary material for: Disability adjusted life years associated with COVID-19 in Denmark in the first year of the pandemic
Source: PubMed Central journal article supplement (PMC9270752; doi:10.1186/s12889-022-13694-9), 2022-07-09
Supplement: 12889_2022_13694_MOESM1_ESM.pdf [file 12889_2022_13694_MOESM1_ESM.pdf]

# Disability adjusted life years associated with COVID-19 in Denmark in the first year of the pandemic - Code

## R Markdown

This is an R Markdown document. Markdown is a simple formatting syntax for authoring HTML, PDF, and MS Word documents. For more details on using R Markdown see <http://rmarkdown.rstudio.com>.

When you click the **Knit** button a document will be generated that includes both content as well as the output of any embedded R code chunks within the document. You can embed an R code chunk like this:

```
library(readxl)
library(writexl)

## Warning: package 'writexl' was built under R version 4.0.4

library(tidyverse)

## Warning: package 'tidyverse' was built under R version 4.0.5

## -- Attaching packages ----- tidyverse 1.
3.1 --

## v ggplot2 3.3.3      v purrr   0.3.4
## v tibble  3.1.1      v dplyr   1.0.5
## v tidyr   1.1.3      v stringr 1.4.0
## v readr   1.4.0      v forcats 0.5.1

## Warning: package 'ggplot2' was built under R version 4.0.5
## Warning: package 'tibble' was built under R version 4.0.5
## Warning: package 'tidyr' was built under R version 4.0.5
## Warning: package 'readr' was built under R version 4.0.5
## Warning: package 'dplyr' was built under R version 4.0.5
## Warning: package 'forcats' was built under R version 4.0.5

## -- Conflicts ----- tidyverse_conflict
s() --
## x dplyr::filter() masks stats::filter()
## x dplyr::lag()    masks stats::lag()

library(mc2d)

## Loading required package: mvtnorm
```

```
##
## Attaching package: 'mc2d'

## The following objects are masked from 'package:base':
##
##   pmax, pmin

library(data.table)

## Warning: package 'data.table' was built under R version 4.0.5

##
## Attaching package: 'data.table'

## The following objects are masked from 'package:dplyr':
##
##   between, first, last

## The following object is masked from 'package:purrr':
##
##   transpose

library(readr)
library(reshape2)

## Warning: package 'reshape2' was built under R version 4.0.5

##
## Attaching package: 'reshape2'

## The following objects are masked from 'package:data.table':
##
##   dcast, melt

## The following object is masked from 'package:tidyr':
##
##   smiths

library(ggplot2)
library(lubridate)

## Warning: package 'lubridate' was built under R version 4.0.4

##
## Attaching package: 'lubridate'

## The following objects are masked from 'package:data.table':
##
##   hour, isoweek, mday, minute, month, quarter, second, wday, week,
##   yday, year
```

```

## The following objects are masked from 'package:base':
##
##   date, intersect, setdiff, union

library(foreach)

## Warning: package 'foreach' was built under R version 4.0.5

##
## Attaching package: 'foreach'

## The following objects are masked from 'package:purrr':
##
##   accumulate, when

#Data Loading

Positive <- read.csv ("M:/Documents/BoD COVID-19 DK/Data/data_positive_05-11-
2021_.csv",sep = ";")

Positive <-as.data.frame(Positive)

#Life expectancy

SEL <- read.csv("M:/Documents/BoD COVID-19 DK/Data/IHME_GBD_2019_TMRLT_Y2021M
01D05 (2).CSV")
#Data management
#Dividing cases into age groups (Agegroup)

Positive <- Positive[complete.cases(Positive[, "SampleAge"]),]
condition0 <- Positive$SampleAge >= 0 & Positive$SampleAge <=9
condition1 <- Positive$SampleAge >= 10 & Positive$SampleAge <=19
condition2 <- Positive$SampleAge >= 20 & Positive$SampleAge <=29
condition3 <- Positive$SampleAge >= 30 & Positive$SampleAge <=39
condition4 <- Positive$SampleAge >= 40 & Positive$SampleAge <=49
condition5 <- Positive$SampleAge >= 50 & Positive$SampleAge <=59
condition6 <- Positive$SampleAge >= 60 & Positive$SampleAge <=69
condition7 <- Positive$SampleAge >= 70 & Positive$SampleAge <=79
condition8 <- Positive$SampleAge >= 80 & Positive$SampleAge <=89
condition9 <- Positive$SampleAge >= 90

Positive$SampleAge <- Positive$SampleAge

Agegroup <- c()

for (i in 1:nrow(Positive)) {
  if (condition0[i]) {
    Agegroup[i] <- "0-9"
  }
}

```

```

} else if (condition1[i]) {
  Agegroup[i] <- "10-19"
} else if (condition2[i]) {
  Agegroup[i] <- "20-29"
} else if (condition3[i]) {
  Agegroup[i] <- "30-39"
} else if (condition4[i]) {
  Agegroup[i] <- "40-49"
} else if (condition5[i]) {
  Agegroup[i] <- "50-59"
} else if (condition6[i]) {
  Agegroup[i] <- "60-69"
} else if (condition7[i]) {
  Agegroup[i] <- "70-79"
} else if (condition8[i]) {
  Agegroup[i] <- "80-89"
} else if (condition9[i]) {
  Agegroup[i] <- "90+"
}
}

```

```
Positive$Agegroup <- Agegroup
```

```

remove(condition0)
remove(condition1)
remove(condition2)
remove(condition3)
remove(condition4)
remove(condition5)
remove(condition6)
remove(condition7)
remove(condition8)
remove(condition9)

```

```
#Calculating incidence per age group
```

```
#Table number of cases per sex and per gender
```

```
table(Positive$sex)
```

```
##
##      F      M
## 108374 103451
```

```
table(Positive$Agegroup)
```

```
##
##  0-9 10-19 20-29 30-39 40-49 50-59 60-69 70-79 80-89  90+
## 14235 32422 39802 28981 31067 30639 16797 10485  5601  1794
```

```

#Number of positives by age and gender

Incidence_all <- table(Positive$Agegroup,Positive$sex)
Incidence_all <-as.data.frame.matrix(Incidence_all)

#####

#Hospitalizations (FirstAdmDT)
Positive$hosp <- ifelse((Positive$EpiLPRFirst_inDT != ' '),yes = "1",no = "0"
)
table(Positive$sex,Positive$hosp)

##
##          0          1
## F 103469    4905
## M  97565    5886

#Number of hospitalized cases by age and gender (hosp =1)

table(Positive$sex,Positive$Agegroup,Positive$hosp)

## , , = 0
##
##
##          0-9 10-19 20-29 30-39 40-49 50-59 60-69 70-79 80-89  90+
## F   6785 15792 20220 14534 16253 15270  7537  4064  2120  893
## M   7353 16525 19237 13923 13982 13868  7498  3721  1199  258
##
## , , = 1
##
##
##          0-9 10-19 20-29 30-39 40-49 50-59 60-69 70-79 80-89  90+
## F     54    59   221   299   374   627   678  1098  1119  376
## M     43    46   124   225   458   874  1084  1602  1163  267

Positive %>% filter(Positive$hosp == "1") %>%
  summarize(table =table(Positive$sex, Positive$Agegroup))

## table.0-9 table.10-19 table.20-29 table.30-39 table.40-49 table.50-59
## 1      6839      15851      20441      14833      16627      15897
## 2      7396      16571      19361      14148      14440      14742
## table.60-69 table.70-79 table.80-89 table.90+
## 1          8215          5162          3239          1269
## 2          8582          5323          2362          525

Incidence_hosp <- table(Positive$Agegroup,Positive$sex,Positive$hosp)
Incidence_hosp <-as.data.frame(Incidence_hosp)
Incidence_hosp <- Incidence_hosp %>% filter(Var3 == "1")
Incidence_hosp$Var3 <- NULL
sum(Incidence_hosp$Freq)

```

```

## [1] 10791

Incidence_hosp_female <- Incidence_hosp %>% filter( Incidence_hosp$Var2 == "F
")
Incidence_hosp_male <- Incidence_hosp %>% filter( Incidence_hosp$Var2 == "M")

Incidence_hosp <- merge(Incidence_hosp_female,Incidence_hosp_male,by="Var1")
remove(Incidence_hosp_female)
remove(Incidence_hosp_male)

#ICU

#Faster version
Positive$ICU <- ifelse((Positive$EpiLprICU_inDT != ''),yes = "1",no = "0")
table(Positive$sex,Positive$ICU)

##
##          0          1
##  F 107945      429
##  M 102606      845

#Number of ICU cases by age and gender (ICU =1)

table(Positive$Agegroup,Positive$sex,Positive$ICU )

## , , = 0
##
##
##          F          M
##  0-9      6833      7394
## 10-19    15847    16566
## 20-29    20430    19351
## 30-39    14815    14126
## 40-49    16590    14396
## 50-59    15843    14593
## 60-69     8110     8379
## 70-79     5025     5015
## 80-89     3189     2265
## 90+       1262     520
##
## , , = 1
##
##
##          F          M
##  0-9          6          2
## 10-19         4          5
## 20-29        11         10

```

```
## 30-39 18 22
## 40-49 37 44
## 50-59 54 149
## 60-69 105 203
## 70-79 137 308
## 80-89 50 97
## 90+ 7 5
```

```
Incidence_ICU <- table(Positive$Agegroup,Positive$sex,Positive$ICU)
Incidence_ICU <- as.data.frame(Incidence_ICU)
Incidence_ICU <- Incidence_ICU %>% filter(Var3 == "1")
Incidence_ICU$Var3 <- NULL
sum(Incidence_ICU$Freq)
```

```
## [1] 1274
```

```
##### Duration#####
```

```
covid <- Positive
```

```
#ICU duration (years)
```

```
covid$ICU_duration <- as.numeric(Positive$Critical)
```

```
#### Calculate mean covid$ICU_duration or fit distribution to duration
```

```
covid1<-covid %>% filter(covid$ICU=="1"& ICU_duration>"0")
```

```
meandurationICU <- mean(covid1$ICU_duration)/365
```

```
#The multiplication by 365 is just to interpret results. We need estimates in years
```

```
#In days
```

```
summary(covid1$ICU_duration) #in days
```

```
##      Min.   1st Qu.   Median     Mean   3rd Qu.     Max.
## 0.00069  4.87960  10.42396  15.36955  20.07292  173.76944
```

```
#Hospitalization duration (years)
```

```
covid$Severe[is.na(covid$Severe)] <- 0
```

```
covid$Critical[is.na(covid$Critical)] <- 0
```

```
covid$hosp_duration <- as.numeric(covid$Severe) + as.numeric(covid$Critical)
```

```
#### Calculate mean covid$ICU_duration or fit distribution to duration
```

```
covid1<-covid %>% filter(covid$hosp=="1"& hosp_duration>"0")
```

```
#The multiplication by 365 is just to interpret results. We need estimates in years
```

```
summary(covid1$hosp_duration)
```

```
##      Min.   1st Qu.   Median     Mean   3rd Qu.     Max.
## 0.4299   2.1569   5.0722   8.6398   9.7722  287.0000
```

```
#Reported in days
```

```
#hospital duration excluding people that were moved to ICU
```

```

covid3<- covid1 %>% filter(Critical == "0")
summary(covid3$hosp_duration)

##      Min. 1st Qu.  Median    Mean 3rd Qu.    Max.
##  0.4299  1.9552  4.5472  6.4678  8.0101 287.0000

meandurationhosp_noICU<- mean(covid3$hosp_duration)/365
#Mean duration noICU in years
#####
#####
##### Calculations #####

## simulations
n <- 10^6

set.seed(264)

#Calculating incidence per age group

#Table number of cases per sex and per gender
table(Positive$sex)

##
##      F      M
## 108374 103451

table(Positive$Agegroup)

##
##  0-9 10-19 20-29 30-39 40-49 50-59 60-69 70-79 80-89  90+
## 14235 32422 39802 28981 31067 30639 16797 10485  5601  1794

#Number of positives by age and gender

Incidence_all <- table(Positive$Agegroup,Positive$sex)

Incidence_all <-as.data.frame.matrix(Incidence_all)

write_xlsx(Incidence_all,"Incidence_all.xlsx")

#Proportions table for all cases

prop.table(table(Positive$sex,Positive$Agegroup))

##
##           0-9          10-19          20-29          30-39          40-49          50-5
9
##  F 0.032286390 0.074831345 0.096500380 0.070025446 0.078494781 0.07504850
7

```



```
## M 0.034915944 0.078230409 0.091401784 0.066791614 0.068170123 0.06959584
2
##
##          60-69          70-79          80-89          90+
## F 0.038782380 0.024369403 0.015291068 0.005990851
## M 0.040514958 0.025129471 0.011150819 0.002478484

#We assume the same % of symptomatic for all age groups. ASSUMPTION!

#Proportion of symptomatic cases

sympt <- rbeta(n=369,shape1=216, shape2 = (369-216))

plot(density(sympt))
```

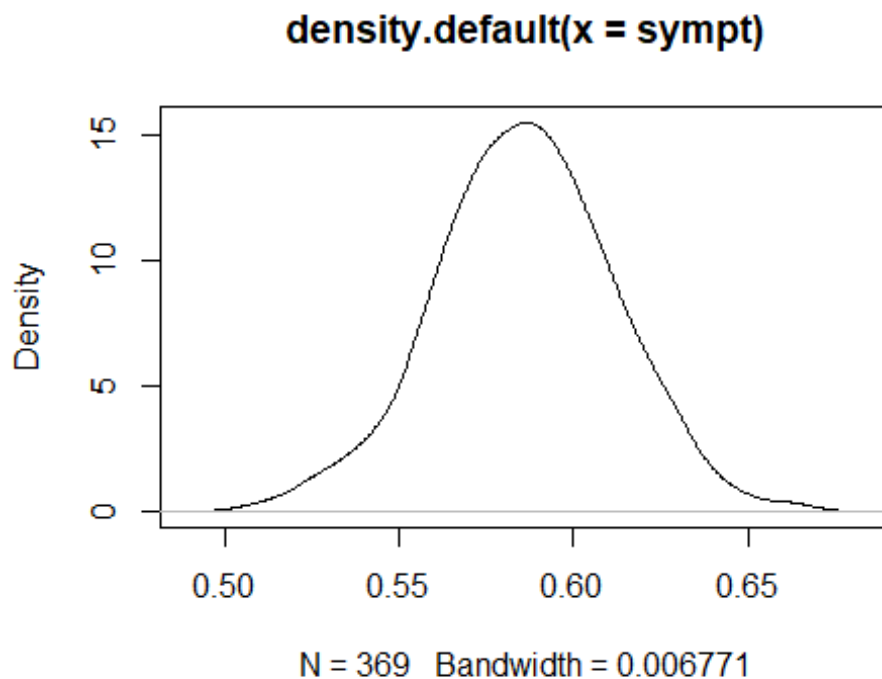

```
#Estimating the number of symptomatic cases per age and sex

#Mean-median-CI
mean_median_ci <-
  function(x) {
    c(mean = mean(x),
      median = median(x),
      quantile(x, probs = c(0.025, 0.975)))
  }

library(foreach)
```

```

Incidence_all$Age <- rownames(Incidence_all)
Incidence_all_melt <- melt(setDT(Incidence_all))

## Using Age as id variables

Incidence_all_symp_mc <- foreach(i = 1:nrow(Incidence_all_melt),.combine = rbind) %do% {
  Incidence<- round(Incidence_all_melt$value[i])
  Symptomatic <- sample(x = sympt,size = n,replace = TRUE)
  Incidence * Symptomatic
}

Incidence_all_symp_mc<- cbind.data.frame(Incidence_all_melt$variable,Incidence_all_symp_mc)
Incidence_all_symp_mc<- cbind.data.frame(Incidence_all_melt$Age,Incidence_all_symp_mc)

rownames(Incidence_all_symp_mc) <- with(Incidence_all_symp_mc, paste(`Incidence_all_melt$Age`,`Incidence_all_melt$variable`,sep = ":"))

summaryinc <- t(apply(X = Incidence_all_symp_mc[,3:ncol(Incidence_all_symp_mc)],1,FUN = mean_median_ci))

summaryinc <- cbind.data.frame(Incidence_all_symp_mc$`Incidence_all_melt$Age`,summaryinc)
summaryinc <- cbind.data.frame(Incidence_all_symp_mc$`Incidence_all_melt$variable`,summaryinc)

#Incidence_all_symp <- round(Incidence_all*symp)

#sum(Incidence_all_symp)

write_xlsx(summaryinc,"summaryinc.xlsx")

#####

#Mild/moderate

#duration=10 days, i.e. 0.027 years
#DW=0.051
# pert distribution
#Min= 0.032, Max= 0.074, mode= 0.051

```

```

YLDmildUncertainty <- foreach(i = 1:nrow(summaryinc),.combine = rbind) %do% {
  Mean1 <- summaryinc[i,3]
  DW <- sample(x = rpert(n = 10000, min = 0.032,mode = 0.051,max = 0.074),size = 10.000,replace = TRUE)
  mean_median_ci(Mean1 * DW * 0.027)
}

colSums(YLDmildUncertainty)

##      mean  median    2.5%    97.5%
## 171.5839 169.0345 136.8064 211.0168

#Apply functions to

YLDmild <- summaryinc[,c(3:6)] * 0.027 * 0.051

colSums(YLDmild)

##      mean  median    2.5%    97.5%
## 170.9730 170.9821 155.3005 184.3208

write_xlsx(YLDmild,"YLDmild.xlsx")
#####

#Hospitalizations (FirstAdmDT)

Positive$hosp <- ifelse((Positive$Severe != "0" ),yes = "1",no = "0")

table(Positive$sex,Positive$hosp)

##
##      0      1
## F    39 4871
## M    80 5815

#Number of hospitalized cases by age and gender (hosp =1)

table(Positive$sex,Positive$Agegroup,Positive$hosp)

## , , = 0
##
##
##      0-9 10-19 20-29 30-39 40-49 50-59 60-69 70-79 80-89 90+
## F      1      2      1      3      2      1      6     13      9      1
## M      2      0      1      1      3      8     20     29     15      1
##
## , , = 1
##
##
##      0-9 10-19 20-29 30-39 40-49 50-59 60-69 70-79 80-89 90+

```

```
## F 53 59 221 296 372 626 672 1086 1111 375
## M 43 46 123 224 456 868 1066 1575 1148 266
```

```
Positive %>% filter(Positive$hosp == "1") %>%
  summarize(table = table(Positive$sex, Positive$Agegroup))
```

```
## table.0-9 table.10-19 table.20-29 table.30-39 table.40-49 table.50-59
## 1 6839 15851 20441 14833 16627 15897
## 2 7396 16571 19361 14148 14440 14742
## table.60-69 table.70-79 table.80-89 table.90+
## 1 8215 5162 3239 1269
## 2 8582 5323 2362 525
```

```
Incidence_hosp <- table(Positive$Agegroup,Positive$sex,Positive$hosp)
```

```
Incidence_hosp <- as.data.frame(Incidence_hosp)
```

```
Incidence_hosp <- Incidence_hosp %>% filter(Var3 == "1")
```

```
Incidence_hosp$Var3 <- NULL
```

```
sum(Incidence_hosp$Freq)
```

```
## [1] 10686
```

```
Incidence_hosp_female <- Incidence_hosp %>% filter( Incidence_hosp$Var2 == "F")
```

```
Incidence_hosp_male <- Incidence_hosp %>% filter( Incidence_hosp$Var2 == "M")
```

```
Incidence_hosp <- rbind.data.frame(Incidence_hosp_female,Incidence_hosp_male)
remove(Incidence_hosp_female)
remove(Incidence_hosp_male)
```

```
write_xlsx(Incidence_hosp,"Incidence_hosp.xlsx")
```

```
## YLD HOSPITALIZATION
```

```
#Duration hosp =meandurationhosp =0.0187
```

```
#DW Severe = 0.133
```

```
YLDhospUncertainty <- foreach(i = 1:nrow(Incidence_hosp),.combine = rbind) %d
o% {
  Mean1 <- Incidence_hosp[i,3]
  DW <- sample(x = rpert(n = 10000, min = 0.088,mode = 0.133,max = 0.190),siz
e = 10.000,replace = TRUE)
  mean_median_ci(Mean1 * DW * meandurationhosp_noICU)
}
```

```
colSums(YLDhospUncertainty)
```

```

##      mean  median    2.5%   97.5%
## 25.59811 25.11605 20.86523 30.98288

YLDhosp <- t(Incidence_hosp$Freq) *meandurationhosp_noICU* 0.133

colSums(YLDhosp)

## [1] 0.1249078 0.1390483 0.5208421 0.6975984 0.8767115 1.4753264 1.5837370
## [8] 2.5594320 2.6183508 0.8837818 0.1013403 0.1084106 0.2898804 0.5279123
## [15] 1.0746786 2.0456602 2.5122970 3.7118835 2.7055506 0.6268959

sum(YLDhosp)

## [1] 25.18425

# YLDhosp by Sex and Age group

YLDhosp_group <- Incidence_hosp %>% group_by(Var2,Var1) %>%
  summarise(YLDhosp_group = Freq *meandurationhosp_noICU* 0.133)

## `summarise()` has grouped output by 'Var2'. You can override using the `.g
roups` argument.

write_xlsx(YLDhosp_group,"YLDhosp_group.xlsx")

YLDhospUncertainty <- cbind.data.frame(Incidence_hosp[,c("Var1","Var2")],YLDh
ospUncertainty)
write_xlsx(as.data.frame(YLDhospUncertainty),"YLDhospUncertainty.xlsx")

#ICU (ICUAdm)

#Faster version
Positive$ICU <- ifelse((Positive$Critical != "0"),yes = "1",no = "0")

table(Positive$sex,Positive$ICU)

##
##      1
##   F 429
##   M 845

#Number of ICU cases by age and gender (ICU =1)

table(Positive$Agegroup,Positive$sex,Positive$ICU )

## , , = 1
##
##
##      F  M

```

```

## 0-9      6  2
## 10-19   4  5
## 20-29  11 10
## 30-39  18 22
## 40-49  37 44
## 50-59  54 149
## 60-69 105 203
## 70-79 137 308
## 80-89  50  97
## 90+    7  5

Incidence_ICU <- table(Positive$Agegroup,Positive$sex,Positive$ICU)

Incidence_ICU <- as.data.frame(Incidence_ICU)

Incidence_ICU <- Incidence_ICU %>% filter(Var3 == "1")

Incidence_ICU$Var3 <- NULL

sum(Incidence_ICU$Freq)

## [1] 1274

write_xlsx(Incidence_ICU,"Incidence_ICU.xlsx")

## YLD ICU

#Duration ICU = meandurationICU = 0.037

#DW Critical = 0.655

YLDICUUncertainty <- foreach(i = 1:nrow(Incidence_hosp),.combine = rbind) %do
% {
  Mean <- Incidence_hosp[i,3]
  DW <- sample(x = rpert(n = 10000, min = 0.579,mode = 0.655,max = 0.727),siz
e = 10.000,replace = TRUE)
  mean_median_ci(Mean * DW * meandurationICU)
}

colSums(YLDICUUncertainty)

##      mean      median      2.5%      97.5%
## 294.7398 293.4525 279.0179 311.2515

YLDICU <- t(Incidence_ICU$Freq) *meandurationICU* 0.655

colSums(YLDICU)

## [1] 0.16548584 0.11032389 0.30339071 0.49645752 1.02049602 1.48937257
## [7] 2.89600222 3.77859338 1.37904868 0.19306681 0.05516195 0.13790487

```

```

## [13] 0.27580974 0.60678142 1.21356284 4.10956506 5.59893763 8.49493985
## [19] 2.67535443 0.13790487

sum(YLDICU)

## [1] 35.13816

# YLDICU by Sex and Age group

#add uncertainty
#0.655 <- rpert(min = 0.569,max = 0.727,n = 10000)

YLDICU_group <- Incidence_ICU %>% group_by(Var2,Var1) %>%
  summarise(YLDICU_group = Freq *meandurationICU* 0.655)

## `summarise()` has grouped output by 'Var2'. You can override using the `.groups` argument.

write_xlsx(YLDICU_group,"YLDICU_group.xlsx")

DALY_YLD <- YLDmild + YLDhosp + YLDICU

colSums(DALY_YLD)

##      mean      median      2.5%      97.5%
## 231.2954 231.3045 215.6229 244.6432

YLD_case<- sum(DALY_YLD) /120654

####Uncertainty

DALY_YLD_Uncertainty <- YLDmildUncertainty + YLDhospUncertainty[,3:6] + YLDICU
Uncertainty
DALY_YLD_Uncertainty <- cbind.data.frame(YLDhospUncertainty[,1:2],DALY_YLD_Un
certainty)
colSums(DALY_YLD_Uncertainty[,3:6])

##      mean      median      2.5%      97.5%
## 491.9218 487.6031 436.6895 553.2512

##### DEATHS #####

#sub-set of data with patients that died

#Calculations with ALL deaths, with variable used to extract data "date of de
ath"
deaths <- Positive %>% filter(as.numeric(Positive$death30days_final) != "NA")

plot(deaths$SampleAge,as.factor(deaths$Agegroup))

```

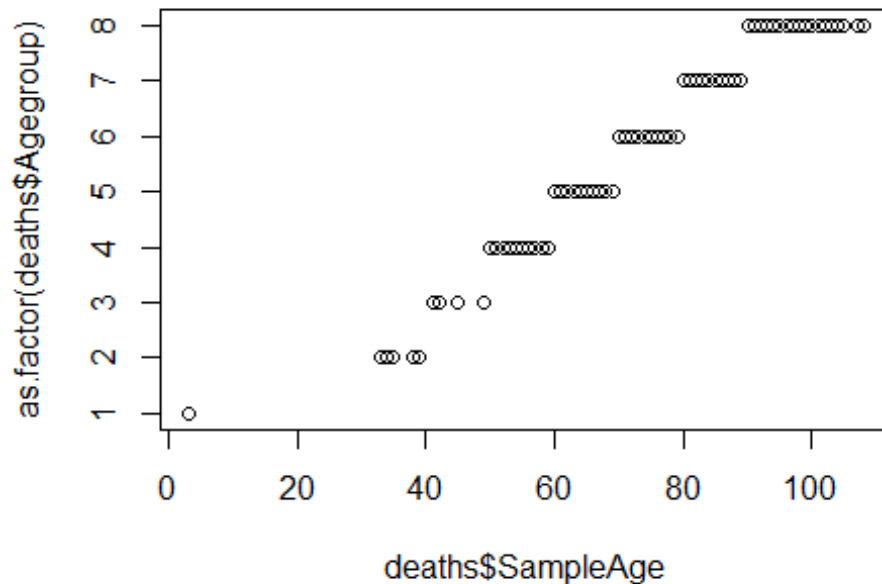

```
#Age of patients =SampleAge
#Number of deaths per age group
numb_deaths <- table(deaths$casedefinition,deaths$SampleAge,deaths$sex)
sum(numb_deaths)
## [1] 2383
table(deaths$sex,deaths$Agegroup)
##
##      0-9 30-39 40-49 50-59 60-69 70-79 80-89 90+
##  F    0     4     2    21    73   228   439  323
##  M    1     2     4    32   122   394   518  220
lifeexpect_mod <- lm (SEL$Life.Expectancy~SEL$Age)
lifeexpect_byyear <- seq(1,107,by=1)
#calculating remaining LE
RLE <- as.data.frame(sapply(lifeexpect_byyear, function(x) {
  (x *(-0.9163)) + 87.217
} ))
colnames(RLE)<- "RLE"
```



```

RLE$RLE[RLE$RLE < 0] <- -0.1685

#plot(lifeexpect_mod)

#Assumption: we ignored if a person celebrated their birthday at the hospital (before dying)

#multiply freq of deaths by age by the corresponding RLE

RLE$SampleAge <- lifeexpect_byyear

colnames(RLE) <- c("RLE", "SampleAge")

#THIS IS NOT WORKING - RLE DOESNT MATCH AGE GROUP
#WE HAVE TO MATCH THE AGE OF DEATH WITH RLE

YLL_person <- merge(deaths, RLE, by="SampleAge")

plot(YLL_person$SampleAge, YLL_person$RLE)

```

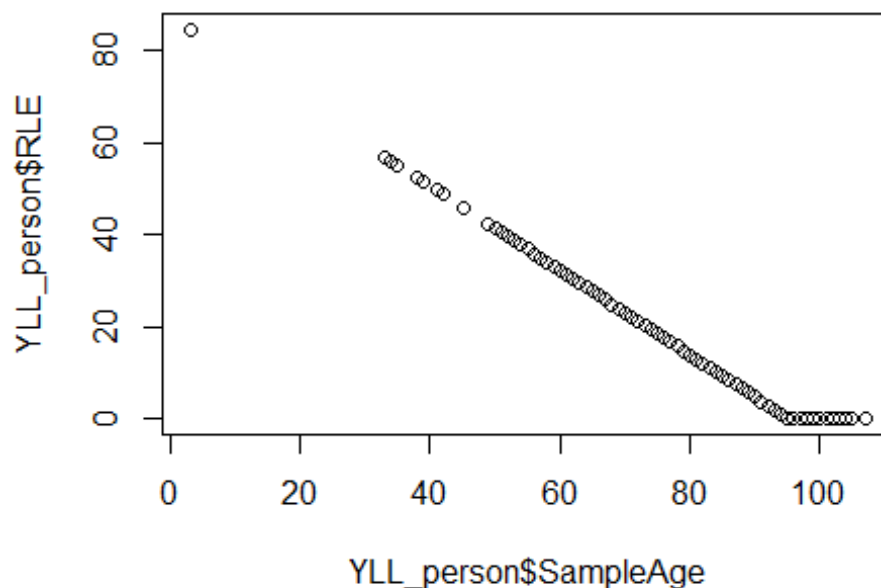

```

YLL_person$Agegroup <- as.factor(YLL_person$Agegroup)

plot(YLL_person$SampleAge, YLL_person$Agegroup)

```

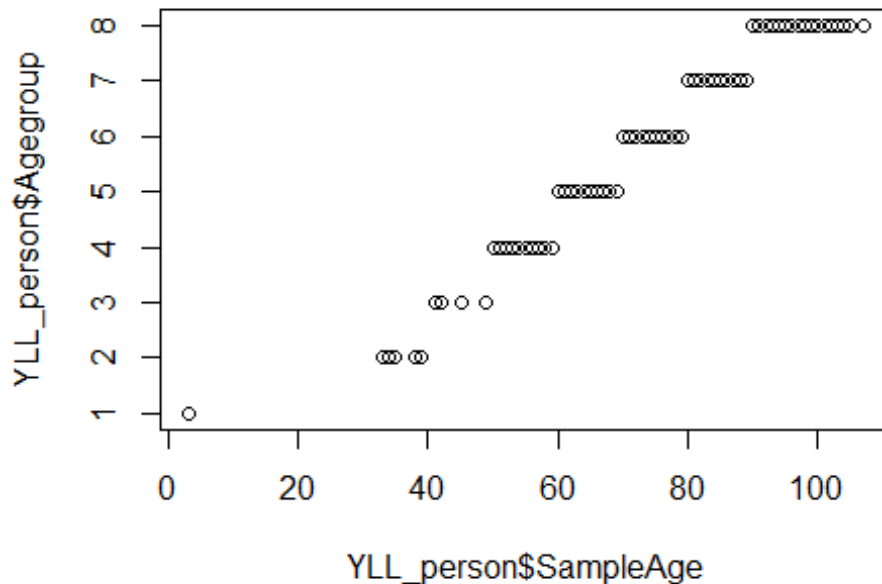

```

Yll_peragegroup <- aggregate(YLL_person$RLE~YLL_person$Agegroup,FUN = sum)

totalYLL <- sum(YLL_person$RLE)

#YLL per Age and Sex

YLL_group <- YLL_person %>% group_by(sex, Agegroup) %>%
  summarise(YLL_group = sum(RLE))

## `summarise()` has grouped output by 'sex'. You can override using the `.groups` argument.

YLL_group <- merge.data.frame(DALY_YLD_Uncertainty[,1:2], YLL_group,
                             by.x = c("Var1", "Var2"), by.y = c("Agegroup", "sex"), all = TRUE)
YLL_group[is.na(YLL_group)] <- 0

YLL_group <- YLL_group[ order(YLL_group$Var2), ]

write_xlsx(YLL_group, "YLL_group.xlsx")

#Danish pop =5806081

#Total DALY

DALY <- (colSums(DALY_YLD) + totalYLL)

```

```

#Total DALY

DALY_GROUP <- cbind.data.frame(DALY_YLD_Uncertainty[,1:2],
                               apply(X = DALY_YLD_Uncertainty[,3:6], MARGIN =
2,FUN = function(i) i + YLL_group$YLL_group))

colnames(DALY_GROUP) <- c("Age","Sex","mean","median","2.5%","97.5%" )

write_xlsx(DALY_GROUP,"DALY_GROUP.xlsx")

#Total DALY per 100,000

DALY_100 <- (sum(DALY_YLD) + totalYLL)/58
DALY_100

## [1] 527.7919

```

Note that the `echo = FALSE` parameter was added to the code chunk to prevent printing of the R code that generated the plot.
